# Supplementary material for: Photodynamic behavior of electronic coupling in a N-methylformamide dimer
Source: Royal Society of Chemistry journal article supplement (doi:10.1039/c4cp04573d), 2015-01-01
Supplement: c4cp04573d1.pdf [file c4cp04573d1.pdf]

# **Photodynamic behavior of electronic coupling in N-methylformamide dimer**

**Martina Zámečnicková and Dana Nachtigallová\***

**Institute of Organic Chemistry and Biochemistry, Flemingovo nám. 2, Prague 6, 166 10,  
Czech Republic**

**Supporting Material**

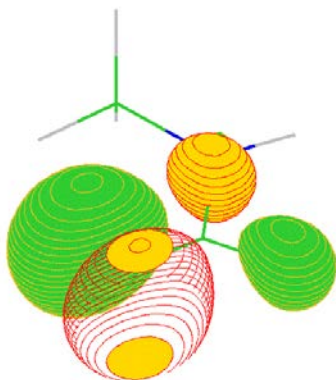

The non-bonding orbital localized on O atom

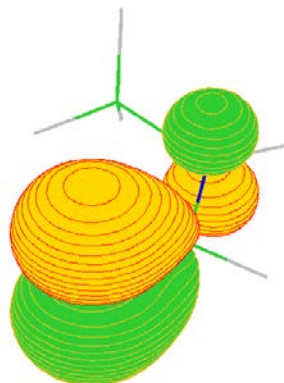

The  $\pi$  orbital localized on CO bond and non-bonding orbital of N atom with  $\pi$  symmetry

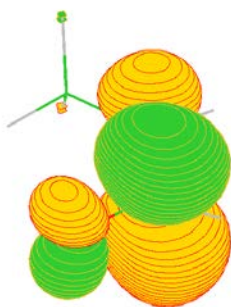

The antibonding  $\pi^*$  orbital

S1. The molecular orbitals involved in the electronic configurations of the excited states of formamide

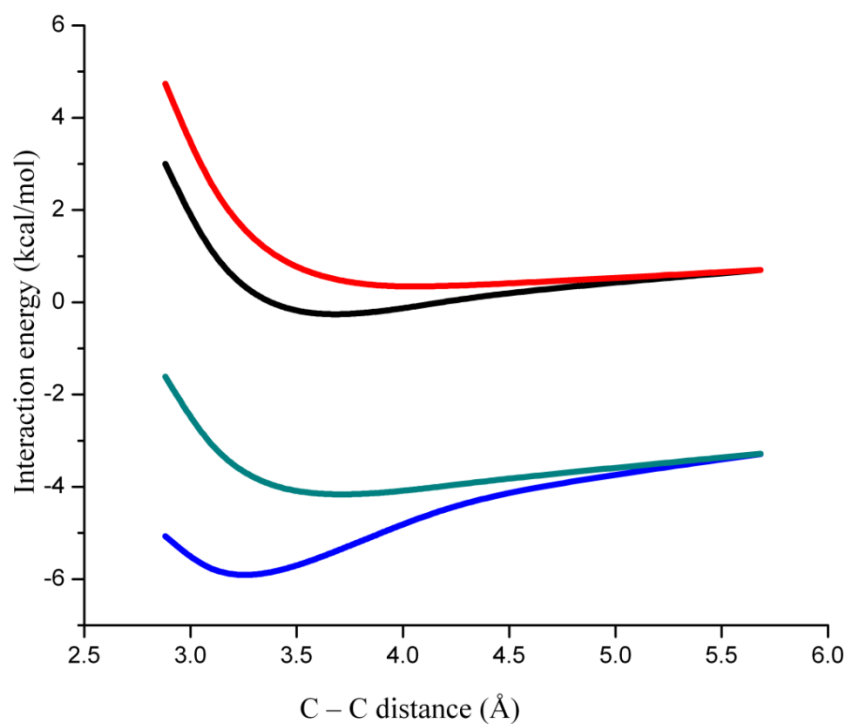

S2. The scan of the interaction energies of N-methyl formamide with respect to C...C distance (C atoms of CO carbonyl group) calculated at the CASSCF level with (red line) and without (black line) BSSE included and CASPT2 level with (green line) and without (blue line) BSSE included.

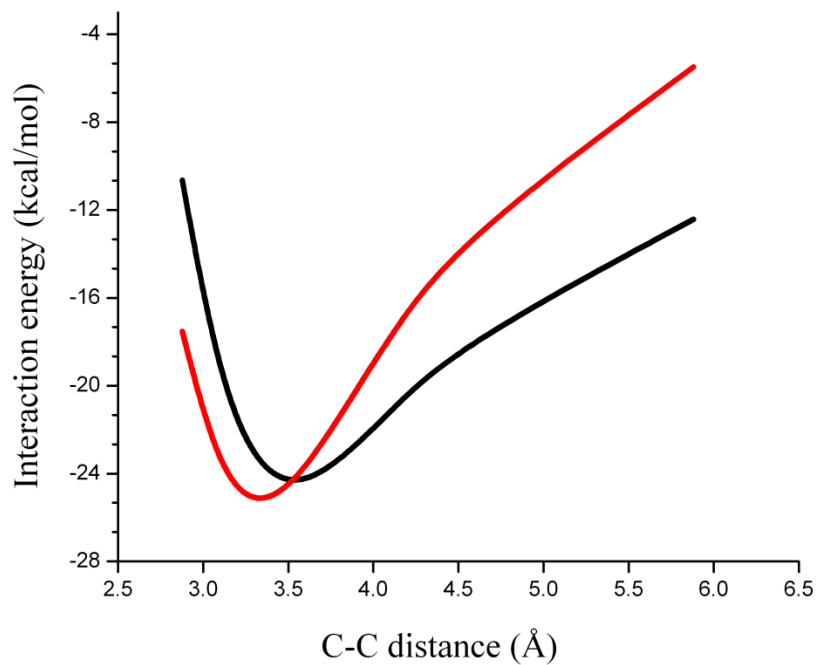

S3. The scan of the interaction energies of N-methylformamide in the complex with water molecule with respect to C...C distance (C atoms of CO carbonyl group) calculated at the CASSCF (black line) and CASPT2 (red line) methods, respectively.
